1 **Crops and the seed mass-seed output trade-off in plants**

2

3 Adam R. Martin<sup>1,\*</sup>

4 <sup>1</sup> Department of Physical and Environmental Sciences, University of Toronto

5 Scarborough, Canada.

6 \* Author correspondence: [adam.martin@utoronto.ca](mailto:adam.martin@utoronto.ca)

7

8 **Abstract**

9 A trade-off between seed mass (SM) and seed output (SO) defines a central axis  
10 of ecological variation among plants, with implications for understanding both plant trait  
11 evolution and plant responses to environmental change. While an observed negative SM-  
12 SO relationship is hypothesized to reflect universal constraints on resource allocation in  
13 all plants, domestication has likely fundamentally altered this relationship. Using a  
14 dataset of SM and SO for 41 of the world most widespread crops and 1,190 wild plant  
15 species, coupled with observational data on these traits in soy (*Glycine max*) and maize  
16 (*Zea mays*), I show that domestication has systematically rewired SM-SO relationships in  
17 crops. Compared to wild plants, virtually all crops express a higher SM for a given SO;  
18 this domestication signature is especially prominent in seed crops, and also influences the  
19 phylogenetic signal in SM and SO. In maize these traits have become positively related  
20 likely due to simultaneous selection for greater SM and SO, while in soy these traits have  
21 become decoupled likely due to primary selection for SM only. Evolved relationships  
22 between SM and SO in plants have been disrupted by both conscious and unconscious  
23 artificial selection, which represents a key aspect of how the functional biology of crops  
24 differ fundamentally from wild plants along “universal” plant trait spectra.

25

26

## 27 **Introduction**

### 28 *Seed mass and seed output as a critical dimension of plant functional ecology*

29 Differences in seed traits including mass, output, shape, dispersal, biochemical  
30 constitution, and dormancy have come to represent critical axes of life-history variation  
31 among plant species worldwide (Westoby et al. 1996, Moles et al. 2005, Diaz et al.  
32 2016). Understanding and quantifying variation in these seed traits among terrestrial plant  
33 species has been central in better understanding a range of large-scale processes including  
34 the evolution of angiosperms and plant biogeography (e.g. Westoby et al. 1992,  
35 Thompson et al. 1993, Westoby et al. 1996, Moles and Westoby 2004, Moles et al. 2005),  
36 as well as multiple aspects of plant life history strategy including dispersal ability, stature,  
37 seedling competitiveness and survivorship, plant- and species responses to disturbance,  
38 colonization ability, and persistence of seeds in soils (Thompson et al. 1993, Westoby et  
39 al. 1996, Leishman et al. 2000, Moles and Westoby 2003, 2004). Of the seed traits  
40 explored in the comparative plant sciences, seed mass (SM) has received the most  
41 research attention (cf. Kattge et al. 2011), with comparative analyses including thousands  
42 of plant species indicating that SM varies by up to 6 orders of magnitude across species  
43 (Westoby et al. 2002, Moles and Westoby 2003). When considered independently or  
44 alongside other leaf-, stem- and whole-plant traits, variation in SM across species  
45 represents a key trait defining the functional ecology of plants worldwide (e.g. Westoby  
46 1998, Cornelissen 1999, Westoby et al. 2002, Diaz et al. 2016).

47 In plant ecology, a long-recognized trade-off between SM and seed output (SO)  
48 remains central to plant resource allocation and life-history theories, particularly as it  
49 pertains to plant reproduction strategies (Harper et al. 1970, Smith and Fretwell 1974,  
50 Lloyd 1987, Westoby et al. 2002, Moles et al. 2004). Under conditions of finite  
51 resources, theory and observation suggest plant species differentiate from one another  
52 along a SM-SO axis that is hypothesized to optimize reproductive fitness and success,  
53 given a certain set of environmental conditions (Sadras 2007). In the simplest conceptual  
54 terms, the endpoints of the SM-SO trade-off are defined by plants allocating resources to  
55 a small number of large seeds, vs. plants that allocate resources to a large number of very  
56 small seeds; the wide variation that exists in between these conceptual points reflects  
57 “optimized” solutions to resource allocation (Sadras 2007). Similar to the evidence that

58 supports the existence of universal trade-offs (or correlations) among other plant  
59 functional traits (e.g. Wright et al. 2004), global databases including trait values from  
60 thousands of species can be used to define a “universal SM-SO” trade-off that exists  
61 among plants globally. The shape of this trade-off reflects evolutionarily defined  
62 constraints on possible combinations of SM and SO that can (or are most likely to) occur  
63 across non-domesticated plant species (hereafter referred to as “wild plants”).

64

#### 65 *Seed mass and seed output trade-offs and crops*

66 Historical analyses (Meyer et al. 2012) coupled with recent observational and  
67 experimental studies, have refined our understanding of how plant trait variation and  
68 correlations have been fundamentally altered by crop domestication (Meyer et al. 2012,  
69 Milla et al. 2014, Martin et al. 2017). While the suites of traits that are under intentional  
70 and unintentional artificial selection is wide – including whole-plant, leaf-, and root traits  
71 (e.g. Milla et al. 2014) – plant yield components including SM and/ or SO have been  
72 under the most intensive selection (Sadras 2007).

73 Assuming that crops have been selected for increased SM and SO leads to the  
74 hypothesis (“Hypothesis 1) that, as compared to a “global SM-SO trade-off”, artificial  
75 selection results in all crops expressing a higher SM for a given SO (or vice versa) as  
76 compared to wild plants. Additionally though, artificial selection directly targets SM and  
77 SO only for a certain group of crops such as cereals (e.g. wheat, rice, and maize), oil seed  
78 crops, or legumes including soy and other pulses. Therefore, one may also hypothesize  
79 (“Hypothesis 2”) that for a given crop species, the degree of divergence away from a  
80 global SM-SO trade-off differs according to the plant organ under selection, with seed  
81 crops showing the strongest divergences on average.

82 Yet even for crops under selection for seeds, within-species SM-SO trade-offs  
83 may differ considerably according to plant growth form and reproductive strategy. In  
84 certain crops including maize – one of the crops employed in my analysis here – both  
85 increased SM (i.e. mean kernel mass) (Hufford et al. 2012) and SO (i.e. mean kernels per  
86 plant) (Brown et al. 2011) have been simultaneously targeted by artificial selection. This  
87 leads to the hypothesis (Hypothesis 3) that, counter to a global SM-SO trade-off, crops  
88 such as maize express a positive SM-SO correlation. Alternatively, genome sequencing

89 indicates that increased SM in soybean – also employed in my analysis here – has been  
90 targeted during artificial selection (Liu et al. 2007, Zhou et al. 2015), while the number of  
91 inflorescences and ultimately SO remains plastic, and largely determined by local  
92 resource availability and concomitant plant growth rates (Andrade et al. 2005). This leads  
93 to the hypothesis (Hypothesis 4) that in soy, covariation along an intraspecific SM-SO  
94 trade-off would be weak or potentially non-existent. Here, I used a large dataset of SM  
95 and SO from 1,190 wild plant species and 41 of the world’s most widespread crops,  
96 derived from both functional trait databases and field studies on maize and soy, in order  
97 to test these four complementary hypotheses.

98

## 99 **Methods**

### 100 *Generating a global SM-SO trade-off with functional trait data*

101 Data for both SM and SO were acquired from a structured enquiry submitted to  
102 the TRY Functional Trait Database (Kattge et al. 2011). We specifically requested  
103 information on trait ID 26 (“seed dry mass”, corresponding to SM) and trait ID 131  
104 (“seed number per plant”, corresponding to SO). This request returned  $n=117,882$  and  
105  $n=9,292$  observations for SM and SO respectively. All statistical analyses were then  
106 performed using R version 3.4.0 (R Foundation for Statistical Computing, Vienna,  
107 Austria). First, for each observation I used the ‘TPL’ function in the “‘Taxonstand’ R  
108 package (Cayuela et al. 2017) in order to cross-reference all species, genus, and family  
109 identities with The Plant List and resolve all synonyms or errors. Once taxonomy checks  
110 were complete, species-level mean values for both SM and SO were then calculated.

111 This list of species was then cross-referenced with a list of the world’s crop  
112 species reported by the Food and Agricultural Organization of the United Nations (FAO)  
113 (FAO 2018), which was refined to species-level taxonomy by Martin and Isaac (2015).  
114 This procedure led to identification of  $n=38$  crop species which had both paired SM-SO  
115 data in TRY, and have been identified by the FAO as a commodity species. I therefore  
116 supplemented the TRY dataset with species mean SM and SO values extracted from the  
117 literature for a number of additional common crops including soy (*Glycine max*(Hayes et  
118 al. 2018)), sunflower (*Helianthus annuus*(Libenson et al. 2002)), rice (*Oryza sativa*(Wang  
119 et al. 2008)), and maize (*Zea mays*(Maddonni and Otegui 2006)); data for SM and SO

120 was also sought for all additional crops listed by Martin and Isaac (2015) which were not  
121 in TRY, but this data was not available in peer-reviewed literature. Therefore in sum, this  
122 data consolidation process resulted in paired SM-SO data for  $n=1231$  species in total.

123 Each of the 41 crop species were then classified broadly according to the main  
124 commercial portion of the plant as one of: i) “seed plants” which are harvested for seeds  
125 ( $n=17$  crop species); ii) “tree crops” which are harvested for timber or as ornamental  
126 species ( $n=3$  crop species); iii) “other crops” which are harvested for other plant parts  
127 including leaves, roots, or large inflorescences ( $n=21$  crop species); or iv) “wild species”  
128 which are non-domesticated plants ( $n=1190$  species).

129

### 130 *Crops along an SM and SO trade-off*

131 Analyses using the ‘fitdist’ function in the ‘fitdistrplus’ R package (Delignette-  
132 Muller and Dutang 2015) indicating that both the SM and SO datasets were better  
133 described by normal or log-normal distributions (as per lower log-likelihood scores;  
134 Table 1), so log-transformed data was used in all subsequent analyses. I first fit a  
135 standardized major axis regression (SMA) model to the entire log-SM and log-SO, in  
136 order to test for the presence of a “global SM-SO trade-off”. This SMA was implemented  
137 in using the ‘sma’ function in the ‘smatr’ R package (Warton et al. 2012), with 95%  
138 confidence limits surrounding the overall model generated through bootstrapping.

139 All SMA model residuals associated with each species were then extracted, and  
140 significant differences in residuals among the four different plant types were evaluated.  
141 Due to unequal sample sizes and non-independence of data points owing to phylogenetic  
142 structure in the data (see below), this test was performed as a linear mixed effects model  
143 using the ‘lme’ function in the ‘nlme’ R package (Pinheiro et al. 2016). Specifically, in  
144 this model SMA residuals were predicted as a function of plant type (as a fixed effect),  
145 while accounting for genus identity nested within family identity (as random effects). In  
146 addition to assessing overall significance of the plant type term (i.e. the fixed effect), I  
147 calculated mean ( $\pm$  S.E.) SMA residuals for each plant type using the ‘lsmeans’ function  
148 in the ‘lsmeans’ R package (Lenth 2016), and assessed the pairwise differences in mean  
149 SMA model residuals among all four plant types using a Tukey post-hoc tests (also  
150 implemented with the ‘lsmeans’ function). Post-hoc tests based on this linear mixed-

151 effect model were considered significant when assessed against a Bonferonni-corrected  
152  $p$ -value of 0.008.

153

#### 154 *Phylogenetic signal in SM and SO*

155 A phylogenetic tree was constructed for the entire  $n=1,231$  species using  
156 Phylomatic (Webb and Donoghue 2005) to generate a phylogenetic tree, based on the  
157 Angiosperm Phylogeny Group megatree (“R20120829.new”). The BLADJ algorithm in  
158 Phylocom (Webb et al. 2008) was used to estimate phylogenetic branch lengths according  
159 to clade ages based on fossil records (Wikstrom et al. 2001) which were updated by  
160 Gastauer and Meira-Neto (2016). Unresolved evolutionary relationships were treated as  
161 polytomies.

162 Phylogenetic signal in log-SM and log-SO across the entire phylogeny was then  
163 quantified as Pagel’s  $\lambda$  (Pagel 1999). For this analysis, a Pagel’s  $\lambda$  value equal to 0  
164 represents instances of no phylogenetic signal (i.e. where evolution of SM and/or SO is  
165 entirely independent of phylogeny), and Pagel’s  $\lambda$  values of 1 represent instances where a  
166 phylogeny perfectly predicts trait data (i.e. where evolution of SM and/or SO perfectly  
167 matches a Brownian model of trait evolution) (Pagel 1999). Values of Pagel’s  $\lambda$  were  
168 calculated using the ‘phylosig’ function in the ‘phytools’ R package (Revell 2012).  
169 Significance tests for were performed as randomization tests (with  $n=1000$   
170 randomizations used), where SM and SO data were randomly shuffled across the  
171 phylogeny, and Pagel’s  $\lambda$  was recalculated on each randomized dataset; phylogenetic  
172 signal was considered statistically significant if the observed Pagel’s  $\lambda$  fell within the  
173 upper 95% of this randomized distribution.

174 In order to assess if the presence of crops influenced phylogenetic signal in SM  
175 and SO, I then recalculated Pagel’s  $\lambda$  with crop species removed from the dataset (where  
176  $n=1,190$  in this reduced phylogeny and trait dataset). Specifically, if Pagel’s  $\lambda$  was to  
177 increase when crops were removed from the phylogeny, this could be interpreted as crops  
178 reducing the strength of the phylogeny signal in SM or SO. All trait-phylogeny  
179 relationships were also graphed visually using the ‘plotTree.wBars’ function in the  
180 ‘phytools’ R package (Revell 2012).

181

182 *Soy and maize along an SM-SO trade-off*

183 I employed two crop species-specific datasets, both derived from field studies, to  
184 evaluate if soy and maize expressed an SM-SO trade-off that was consistent with a global  
185 pattern (i.e. based on the  $n=1,231$  species dataset). Soy data was taken from a published  
186 field study focused on soy leaf economics traits that was conducted on a 30-year old  
187 experimental farm in Guelph, Canada ( $43^{\circ} 32' N$ ,  $80^{\circ} 12' W$ ) (Hayes et al. 2018). This  
188 study provided paired plant-level SM and SO data for  $n=45$  soy plants (detailed in (Hayes  
189 et al. 2018)). Maize data was taken from two different field studies conducted at the same  
190 site, where paired SM and SO data was directly available (Maddonni and Otegui 2006,  
191 Mayer et al. 2012). Specifically,  $n=26$  paired maize SM-SO observations were available  
192 in Table 1 of (Maddonni and Otegui 2006), while  $n=8$  paired maize SM-SO data were  
193 taken from Table 1 of (Mayer et al. 2012). Data from both maize studies were derived  
194 from field experiments at the same site (the Experimental Station of the National Institute  
195 of Agricultural Technology) in Pergamino, Argentina ( $33^{\circ} 56' S$ ,  $60^{\circ} 34' W$ ). I then used  
196 fit a SMA model (as described above) to both soy and maize datasets separately to  
197 describe intraspecific SM and SO patterns, and where SMA models were significant,  
198 95% confidence limits were generated through bootstrapping with replacement (with  
199 1000 replicates used) implemented with the 'bootstrap' function in the 'modelr' R  
200 package (Wickham 2017).

201

202 *Data availability*

203 The compiled database of  $n=1,231$  plant species used in my analyses here  
204 (presented in Figs. 1 and 4) are available as individual datasets in the TRY Functional  
205 Trait Database. Compiled data on soy and maize (presented in Fig. 3) are available upon  
206 request from the author, or in the original publications as cited in the methods.

207

208 **Results**

209 *Crops along a global seed mass seed output trade-off*

210 Data from  $n=1231$  species across 517 genera and 92 families demonstrate the  
211 presence of a SM-SO trade-off in plants globally, with a standardized major axis (SMA)  
212 regression slope of  $-0.86$  (95% C.I. =  $-0.91$ ,  $-0.82$ , SMA  $r^2=0.06$ ,  $p<0.0001$ ; Fig. 1). Of

213 the 41 crop species represented in the SM-SO dataset, 90.2% (37 crop species) fell above  
214 the global SM-SO axis (where SMA model residuals  $\geq 0$ ) while only four fell below the  
215 primary SM-SO axis (Fig. 1). In comparison, 46.1% and 53.9% of the  $n=1190$  wild plant  
216 species were approximately evenly distributed above and below the primary SM-SO  
217 model, respectively (Figs. 1 and 2).

218 Across all 1231 species, SMA model residuals ranged from -8.4 to 11.7 (average  
219 residual= $1.14e-11 \pm 2.5$  (S.D.)). While accounting for the phylogenetic non-independence  
220 of data (Figs. S1 and S2) and uneven sample sizes, the extent of divergence from the SM-  
221 SO axis differed significantly across crop types (mixed-effects model  $F_{4, 711}=13.1$ ,  
222  $p<0.001$ , Fig. 2). Specifically, SMA residuals for seed- and tree crops were significantly  
223 greater than zero ( $p \leq 0.001$ ), while residuals for non-seed/ tree crops and wild plant  
224 species did not differ from zero ( $p \geq 0.067$ , Table S1).

225 There was a gradation of divergence from a central SM-SO trade-off (Fig. 2).  
226 Tree crops and seed crops expressed the highest SM for a given SO, and in comparison  
227 non-seed crops and wild plant expressed lower SM for a given SO; these groups broadly  
228 differed significantly from one another in terms of average divergence from a central SM-  
229 SO axis (Table S1). Crops harvested for seeds diverged significantly more strongly from  
230 a central SM-SO trade-off as compared to wild plants (post-hoc contrast  $p \leq 0.0001$ ; Table  
231 S2). Furthermore, 17 seed crops expressed higher average SMA residuals ( $3.4 \pm 1.6$  (S.D.)),  
232 in comparison to the average SMA residuals observed in 21 non-seed crops ( $1.6 \pm 1.8$   
233 (S.D.)) (Fig. 2, Table S2) The three tree crops in the dataset differed most strongly from a  
234 central SM-SO trade-off, showing SMA residuals which were significantly higher than  
235 all other crops and wild plants ( $8.4 \pm 1.8$  (S.D.); post-hoc  $p \leq 0.04$  for all three contrasts;  
236 Fig. 2). Among seed crops, notable divergences from the global SM-SO model included  
237 hazelnut (*Corylus avellana*, SMA residual=7.3), maize (*Zea mays*, SMA residual=5.1),  
238 and sunflower (*Helianthus annuus*, SMA residual=4.8).

239

#### 240 *Within-crop seed mass seed output trade-offs*

241 Data from soy ( $n=45$ ) and maize ( $n=35$ ) indicated that SM-SO patterns differed  
242 both between these crops, as well as in comparison to a global SM-SO pattern. In maize  
243 SM and SO covaried significantly among individual plants (SMA  $r^2=0.334$ ,  $p<0.0001$ ;



244 Fig. 3), however artificial selection has resulted in this relationship being positive and  
245 therefore opposite that of a global SM-SO pattern (maize SMA slope=0.27, 95% C.I. =  
246 0.20, 0.37, Fig. 3). Alternatively, soy data indicate that targeted selection for higher SM  
247 alone has resulted in a decoupling of SM and SO (Fig. 3). These two seed traits were not  
248 significantly related in soy, expressing only a weak negative relationship (SMA slope=-  
249 0.14, 95% C.I.=-0.2, -0.11, SMA  $r^2=0.002$ ,  $p=0.757$ ; Fig. 3). Consistent with  
250 reproductive allocation theory and targeted selection for SM(Sadras 2007), the lack of a  
251 significant SM-SO relationship in soy was qualitatively associated with variation in SM  
252 which was nearly an order of magnitude lower than variation in SO (where CV=9.5 and  
253 76.3, respectively; Table S1).

254

#### 255 *Phylogenetic signal along the seed mass-seed output trade-off*

256 Across the entire dataset ( $n=1231$ ) both SM and SO expressed significant  
257 phylogenetic signal, with Pagel's  $\lambda$  of 0.995 and 0.853, respectively ( $p<0.001$  in both  
258 cases, Fig. 4). When crops are removed from the dataset, SM and SO are better predicted  
259 by phylogenetic relatedness than when artificially crops are present. Specifically,  
260 excluding crops from the datasets resulted in a small, albeit detectable, increase in Pagel's  
261  $\lambda$  for both SM (0.996 with crops) and SO (0.859 with crops).

262

## 263 **Discussion**

### 264 *The functional profile of crops vs. wild plants*

265 Research documenting the traits that have been targeted by crop domestication  
266 suggests that SM and/or SO are among those under the most intensive artificial selection  
267 (Meyer et al. 2012). While much of this research has taken archaeological and/or genetic  
268 approaches the analysis presented here refines a functional trait-based signature of crop  
269 domestication and artificial selection. Specifically, consistent with my hypotheses i)  
270 artificial selection has led to most crops significantly deviating from a global SM-SO  
271 trade-off (Fig. 1), such that ii) crops under selection for seeds deviate most strongly as  
272 compared to non-seed crops (Fig. 2). Yet within seed crops the degree to which artificial  
273 selection has reshaped the evolved biomechanical and/ or physiological constraints on  
274 trait syndromes (or trait trade-offs), depends on the specific reproductive traits/ yield

275 components being targeted (Fig. 3). In certain crops such as maize, artificial selection has  
276 fundamentally altered the direction of trait trade-offs imposed by natural selection, while  
277 in others such as soy artificial selection may only act to decouple the covariation among  
278 reproductive traits (Fig. 3)

279         When taken with studies examining other suites of crop functional traits and trait  
280 spectra (Milla et al. 2014, Martin et al. 2017), the shifts in SM-SO trade-offs in crops vs.  
281 wild plants observed here (Figs. 1-3) represent components of a broader “disruption” in  
282 plant resource-use syndromes incurred by artificial selection (Milla et al. 2014). Other  
283 and observational data indicate that crops generally express greater values of resource  
284 capture traits as compared to their wild progenitors. Indeed, detailed analyses of leaf traits  
285 indicate that certain crops express among the most extreme “resource-acquiring” trait  
286 syndromes in plants globally (Martin et al. 2018), while at the same time artificial  
287 selection has resulted in trait relationships, or “phenotypic integration”(Milla et al. 2014),  
288 that are considerably weaker in crops vs. wild plants (Milla et al. 2014, Martin et al.  
289 2017).

290         While neither SM nor SO values in crops have been shifted to extreme ends of a  
291 reproduction trait spectrum (Fig. 4), the analysis here indicates that relationships between  
292 SM and SO within individual species may be fundamentally rewired through  
293 domestication (Fig. 3). Our results and other studies exploring trait syndrome disruption  
294 (e.g. Milla et al. 2014) provide compelling evidence to indicate crops fundamentally  
295 differ from wild plants along a global spectrum of plant form and function(Diaz et al.  
296 2016). Quantifying the position of crops and how their traits trade-off along a global trait  
297 spectra (Wright et al. 2004, Diaz et al. 2016) represents a means of synthetically defining  
298 the functional ecology of crops, which in turn would support a range of hypotheses on the  
299 unintended impacts of artificial selection.

300

### 301 *Conscious and unconscious selection and trait trade-offs in crops*

302         Studies employing quantitative trait locus (QTL) mapping would suggest that the  
303 results here deviations of crops away from a central SM-SO trade-off (Fig. 1), have likely  
304 occurred largely in response to “conscious selection” for these individual traits (e.g. Tao  
305 et al. 2017). Major shifts in the shape of the SM-SO relationship in the two crops

306 explored here is also consistent with strong conscious selection for these particular traits  
307 (Fig. 3). Furthermore, analyses of phylogenetic patterns in seed traits here demonstrated a  
308 small albeit detectable reduction in phylogenetic signal when crops are removed from  
309 analyses (Fig. 4). Major deviations in SM and SO among crops vs. wild relatives, both  
310 here and in experimental studies, are most likely consistent with long-term conscious  
311 selection of seed traits.

312 At the same time though, theories from functional trait-based ecology do  
313 hypothesize that unconscious selection has also played a role in reshaping SM-SO  
314 relationships in crops. Specifically, from a plant resource allocation/ natural selection  
315 perspective, higher SM at a given SO in open cultivated agricultural environments would  
316 be expected to competitive benefits to crop plants, including greater seedling growth rates  
317 and survival at greater burial depths. Yet while this theory derived from plant resource  
318 allocation theory suggests that unconscious selection may also have contributed to the  
319 patterns observed here, experimental evidence in support of this hypothesis is currently  
320 lacking (reviewed by Milla et al. 2015). Detailed partitioning of the relative importance  
321 of conscious vs. unconscious selection remains a leading avenue for better understanding  
322 the genetic vs. phenotypic controls on SM, SO, and their relationships in crops.

323

## 324 **References**

- 325 Andrade, F. H., V. O. Sadras, C. R. C. Vega, and L. Echarte. 2005. Physiological  
326 determinants of crop growth and yield in maize, sunflower and soybean. *Journal*  
327 *of Crop Improvement* **14**:51-101.
- 328 Brown, P. J., N. Upadyayula, G. S. Mahone, F. Tian, P. J. Bradbury, S. Myles, J. B.  
329 Holland, S. Flint-Garcia, M. D. McMullen, E. S. Buckler, and T. R. Rocheford.  
330 2011. Distinct genetic architectures for male and female inflorescence traits of  
331 maize. *Plos Genetics* **7**.
- 332 Cayuela, L., A. Stein, and J. Oksanen. 2017. Taxonstand: Taxonomic Standardization of  
333 Plant Species Names. R package version 2.1. [https://CRAN.R-](https://CRAN.R-project.org/package=Taxonstand)  
334 [project.org/package=Taxonstand](https://CRAN.R-project.org/package=Taxonstand).
- 335 Cornelissen, J. H. C. 1999. A triangular relationship between leaf size and seed size  
336 among woody species: allometry, ontogeny, ecology and taxonomy. *Oecologia*  
337 **118**:248-255.
- 338 Delignette-Muller, M. L., and C. Dutang. 2015. *fitdistrplus*: an R package for fitting  
339 distributions. *Journal of Statistical Software* **64**:1-34.
- 340 Diaz, S., J. Kattge, J. H. C. Cornelissen, I. J. Wright, S. Lavorel, S. Dray, B. Reu, M.  
341 Kleyer, C. Wirth, I. C. Prentice, E. Garnier, G. Bonisch, M. Westoby, H. Poorter,  
342 P. B. Reich, A. T. Moles, J. Dickie, A. N. Gillison, A. E. Zanne, J. Chave, S. J.

- 343 Wright, S. N. Sheremet'ev, H. Jactel, C. Baraloto, B. Cerabolini, S. Pierce, B.  
344 Shipley, D. Kirkup, F. Casanoves, J. S. Joswig, A. Gunther, V. Falczuk, N. Ruger,  
345 M. D. Mahecha, and L. D. Gorne. 2016. The global spectrum of plant form and  
346 function. *Nature* **529**:167-171.
- 347 FAO. 2018. <http://www.fao.org/economic/ess/ess-standards/commodity/en/>.
- 348 Gastauer, M., and J. A. A. Meira-Neto. 2016. An enhanced calibration of a recently  
349 released megatree for the analysis of phylogenetic diversity. *Brazilian Journal of*  
350 *Biology* **76**:619-628.
- 351 Harper, J. L., P. H. Lovell, and K. G. Moore. 1970. The shapes and sizes of seeds. *Annual*  
352 *Review of Ecology and Systematics* **1**:327-356.
- 353 Hayes, F. J., S. W. Buchanan, B. Coleman, A. M. Gordon, P. B. Reich, N. V.  
354 Thevathasan, I. J. Wright, and A. R. Martin. 2018. Intraspecific variation in soy  
355 across the leaf economics spectrum. *Annals of Botany*:mcy147.
- 356 Hufford, M. B., X. Xu, J. van Heerwaarden, T. Pyhajarvi, J. M. Chia, R. A. Cartwright,  
357 R. J. Elshire, J. C. Glaubitz, K. E. Guill, S. M. Kaeppler, J. S. Lai, P. L. Morrell,  
358 L. M. Shannon, C. Song, N. M. Springer, R. A. Swanson-Wagner, P. Tiffin, J.  
359 Wang, G. Y. Zhang, J. Doebley, M. D. McMullen, D. Ware, E. S. Buckler, S.  
360 Yang, and J. Ross-Ibarra. 2012. Comparative population genomics of maize  
361 domestication and improvement. *Nature Genetics* **44**:808-U118.
- 362 Kattge, J., S. Diaz, S. Lavorel, C. Prentice, P. Leadley, G. Bonisch, E. Garnier, M.  
363 Westoby, P. B. Reich, I. J. Wright, J. H. C. Cornelissen, C. Violle, S. P. Harrison,  
364 P. M. van Bodegom, M. Reichstein, B. J. Enquist, N. A. Soudzilovskaia, D. D.  
365 Ackerly, M. Anand, O. Atkin, M. Bahn, T. R. Baker, D. Baldocchi, R. Bekker, C.  
366 C. Blanco, B. Blonder, W. J. Bond, R. Bradstock, D. E. Bunker, F. Casanoves, J.  
367 Cavender-Bares, J. Q. Chambers, F. S. Chapin, J. Chave, D. Coomes, W. K.  
368 Cornwell, J. M. Craine, B. H. Dobrin, L. Duarte, W. Durka, J. Elser, G. Esser, M.  
369 Estiarte, W. F. Fagan, J. Fang, F. Fernandez-Mendez, A. Fidelis, B. Finegan, O.  
370 Flores, H. Ford, D. Frank, G. T. Freschet, N. M. Fyllas, R. V. Gallagher, W. A.  
371 Green, A. G. Gutierrez, T. Hickler, S. I. Higgins, J. G. Hodgson, A. Jalili, S.  
372 Jansen, C. A. Joly, A. J. Kerkhoff, D. Kirkup, K. Kitajima, M. Kleyer, S. Klotz, J.  
373 M. H. Knops, K. Kramer, I. Kuhn, H. Kurokawa, D. Laughlin, T. D. Lee, M.  
374 Leishman, F. Lens, T. Lenz, S. L. Lewis, J. Lloyd, J. Llusia, F. Louault, S. Ma, M.  
375 D. Mahecha, P. Manning, T. Massad, B. E. Medlyn, J. Messier, A. T. Moles, S. C.  
376 Muller, K. Nadrowski, S. Naeem, U. Niinemets, S. Nollert, A. Nuske, R. Ogaya,  
377 J. Oleksyn, V. G. Onipchenko, Y. Onoda, J. Ordóñez, G. Overbeck, W. A.  
378 Ozinga, S. Patino, S. Paula, J. G. Pausas, J. Penuelas, O. L. Phillips, V. Pillar, H.  
379 Poorter, L. Poorter, P. Poschlod, A. Prinzing, R. Proulx, A. Rammig, S. Reinsch,  
380 B. Reu, L. Sack, B. Salgado-Negre, J. Sardans, S. Shiodera, B. Shipley, A. Siefert,  
381 E. Sosinski, J. F. Soussana, E. Swaine, N. Swenson, K. Thompson, P. Thornton,  
382 M. Waldram, E. Weiher, M. White, S. White, S. J. Wright, B. Yguel, S. Zaehle,  
383 A. E. Zanne, and C. Wirth. 2011. TRY - a global database of plant traits. *Global*  
384 *Change Biology* **17**:2905-2935.
- 385 Leishman, M. R. I., I. J. Wright, A. T. Moles, and M. Westoby. 2000. The evolutionary  
386 ecology of seed size. Pages 31-57 *Seeds: the ecology of regeneration in plant*  
387 *communities* 2.

- 388 Lenth, R. V. 2016. Least-squares means: the R package *lsmeans*. Journal of Statistical  
389 Software **69**:1-33.
- 390 Libenson, S., V. Rodriguez, M. L. Pereira, R. A. Sanchez, and J. J. Casal. 2002. Low red  
391 to far-red ratios reaching the stem reduce grain yield in sunflower (vol 42, pg  
392 1180, 2001). Crop Science **42**:1761-1761.
- 393 Liu, B., T. Fujita, Z. H. Yan, S. Sakamoto, D. Xu, and J. Abe. 2007. QTL mapping of  
394 domestication-related traits in soybean (*Glycine max*). Annals of Botany  
395 **100**:1027-1038.
- 396 Lloyd, D. G. 1987. Selection of offspring size at independence and other size-versus-  
397 number strategies. American Naturalist **129**:800-817.
- 398 Maddonni, G. A., and M. E. Otegui. 2006. Intra-specific competition in maize:  
399 contribution of extreme plant hierarchies to grain yield, grain yield components  
400 and kernel composition. Field Crops Research **97**:155-166.
- 401 Martin, A. R., C. E. Hale, B. E. L. Cerabolini, J. H. C. Cornelissen, J. Craine, W. A.  
402 Gough, J. Kattge, and C. K. Tirona. 2018. Inter- and intraspecific variation in leaf  
403 economics traits in wheat and maize. Aob Plants **10**:ply006.
- 404 Martin, A. R., and M. E. Isaac. 2015. Plant functional traits in agroecosystems: a  
405 blueprint for research. Journal of Applied Ecology **52**:1425-1435.
- 406 Martin, A. R., B. Rapidel, O. Roupsard, K. Van den Meersche, E. de M. Virginio Filho,  
407 M. Mirna Barrios, and M. E. Isaac. 2017. Intraspecific trait variation across  
408 multiple scales: the Leaf Economics Spectrum in coffee. Functional Ecology  
409 **31**:604–612.
- 410 Mayer, L. I., M. A. Rossini, and G. A. Maddonni. 2012. Inter-plant variation of grain  
411 yield components and kernel composition of maize crops grown under contrasting  
412 nitrogen supply. Field Crops Research **125**:98-108.
- 413 Meyer, R. S., A. E. DuVal, and H. R. Jensen. 2012. Patterns and processes in crop  
414 domestication: an historical review and quantitative analysis of 203 global food  
415 crops. New Phytologist **196**:29-48.
- 416 Milla, R., J. Morente-Lopez, J. M. Alonso-Rodrigo, N. Martin-Robles, and F. S. Chapin.  
417 2014. Shifts and disruptions in resource-use trait syndromes during the evolution  
418 of herbaceous crops. Proceedings of the Royal Society B **281**.
- 419 Milla, R., C. P. Osborne, M. M. Turcotte, and C. Violle. 2015. Plant domestication  
420 through an ecological lens. Trends in Ecology & Evolution **30**:463-469.
- 421 Moles, A. T., D. D. Ackerly, C. O. Webb, J. C. Tweddle, J. B. Dickie, and M. Westoby.  
422 2005. A brief history of seed size. Science **307**:576-580.
- 423 Moles, A. T., D. S. Falster, M. R. Leishman, and M. Westoby. 2004. Small-seeded  
424 species produce more seeds per square metre of canopy per year, but not per  
425 individual per lifetime. Journal of Ecology **92**:384-396.
- 426 Moles, A. T., and M. Westoby. 2003. Latitude, seed predation and seed mass. Journal of  
427 Biogeography **30**:105-128.
- 428 Moles, A. T., and M. Westoby. 2004. Seedling survival and seed size: a synthesis of the  
429 literature. Journal of Ecology **92**:372-383.
- 430 Pagel, M. 1999. Inferring the historical patterns of biological evolution. Nature **401**:877-  
431 884.
- 432 Pinheiro, J., D. Bates, S. DebRoy, D. Sarkar, and R. C. Team. 2016. *nlme*: Linear and  
433 Nonlinear Mixed Effects Models. R package version 3.1-127.

- 434 Revell, L. J. 2012. phytools: an R package for phylogenetic comparative biology (and  
435 other things). *Methods in Ecology and Evolution* **3**:217-223.
- 436 Sadras, V. O. 2007. Evolutionary aspects of the trade-off between seed size and number  
437 in crops. *Field Crops Research* **100**:125-138.
- 438 Smith, C. C., and S. D. Fretwell. 1974. The optimal balance between size and number of  
439 offspring. *The American Naturalist* **108**:499-506.
- 440 Tao, Y. F., E. S. Mace, S. S. Tai, A. Cruickshank, B. C. Campbell, X. R. Zhao, E. J. Van  
441 Oosterom, I. D. Godwin, J. R. Botella, and D. R. Jordan. 2017. Whole-genome  
442 analysis of candidate genes associated with seed size and weight in *Sorghum*  
443 *bicolor* reveals signatures of artificial selection and insights into parallel  
444 domestication in cereal crops. *Frontiers in Plant Science* **8**.
- 445 Thompson, K., S. R. Band, and J. G. Hodgson. 1993. Seed size and shape predict  
446 persistence in soil. *Functional Ecology* **7**:236-241.
- 447 Wang, E., J. Wang, X. D. Zhu, W. Hao, L. Y. Wang, Q. Li, L. X. Zhang, W. He, B. R.  
448 Lu, H. X. Lin, H. Ma, G. Q. Zhang, and Z. H. He. 2008. Control of rice grain-  
449 filling and yield by a gene with a potential signature of domestication. *Nature*  
450 *Genetics* **40**:1370-1374.
- 451 Warton, D. I., R. A. Duursma, D. S. Falster, and S. Taskinen. 2012. *smatr 3*-an R package  
452 for estimation and inference about allometric lines. *Methods in Ecology and*  
453 *Evolution* **3**:257-259.
- 454 Webb, C. O., D. D. Ackerly, and S. W. Kembel. 2008. Phylocom: software for the  
455 analysis of phylogenetic community structure and trait evolution. *Bioinformatics*  
456 **24**:2098-2100.
- 457 Webb, C. O., and M. J. Donoghue. 2005. Phylomatic: tree assembly for applied  
458 phylogenetics. *Molecular Ecology Notes* **5**:181-183.
- 459 Westoby, M. 1998. A leaf-height-seed (LHS) plant ecology strategy scheme. *Plant and*  
460 *Soil* **199**:213-227.
- 461 Westoby, M., D. S. Falster, A. T. Moles, P. A. Veski, and I. J. Wright. 2002. Plant  
462 ecological strategies: Some leading dimensions of variation between species.  
463 *Annual Review of Ecology and Systematics* **33**:125-159.
- 464 Westoby, M., E. Jurado, and M. Leishman. 1992. Comparative evolutionary ecology of  
465 seed size. *Trends in Ecology & Evolution* **7**:368-372.
- 466 Westoby, M., M. Leishman, and J. Lord. 1996. Comparative ecology of seed size and  
467 dispersal. *Philosophical Transactions of the Royal Society B-Biological Sciences*  
468 **351**:1309-1317.
- 469 Wickham, H. 2017. modelr: Modelling Functions that Work with the Pipe. R package  
470 version 0.1.1. <https://CRAN.R-project.org/package=modelr>.
- 471 Wikstrom, N., V. Savolainen, and M. W. Chase. 2001. Evolution of the angiosperms:  
472 calibrating the family tree. *Proceedings of the Royal Society B-Biological*  
473 *Sciences* **268**:2211-2220.
- 474 Wright, I. J., P. B. Reich, M. Westoby, D. D. Ackerly, Z. Baruch, F. Bongers, J.  
475 Cavender-Bares, T. Chapin, J. H. C. Cornelissen, M. Diemer, J. Flexas, E.  
476 Garnier, P. K. Groom, J. Gulias, K. Hikosaka, B. B. Lamont, T. Lee, W. Lee, C.  
477 Lusk, J. J. Midgley, M. L. Navas, U. Niinemets, J. Oleksyn, N. Osada, H. Poorter,  
478 P. Poot, L. Prior, V. I. Pyankov, C. Roumet, S. C. Thomas, M. G. Tjoelker, E. J.

479 Veneklaas, and R. Villar. 2004. The worldwide leaf economics spectrum. *Nature*  
480 **428**:821-827.  
481 Zhou, Z. K., Y. Jiang, Z. Wang, Z. H. Gou, J. Lyu, W. Y. Li, Y. J. Yu, L. P. Shu, Y. J.  
482 Zhao, Y. M. Ma, C. Fang, Y. T. Shen, T. F. Liu, C. C. Li, Q. Li, M. Wu, M.  
483 Wang, Y. S. Wu, Y. Dong, W. T. Wan, X. Wang, Z. L. Ding, Y. D. Gao, H.  
484 Xiang, B. G. Zhu, S. H. Lee, W. Wang, and Z. X. Tian. 2015. Resequencing 302  
485 wild and cultivated accessions identifies genes related to domestication and  
486 improvement in soybean. *Nature Biotechnology* **33**:408-U125.  
487

488 **Figures**

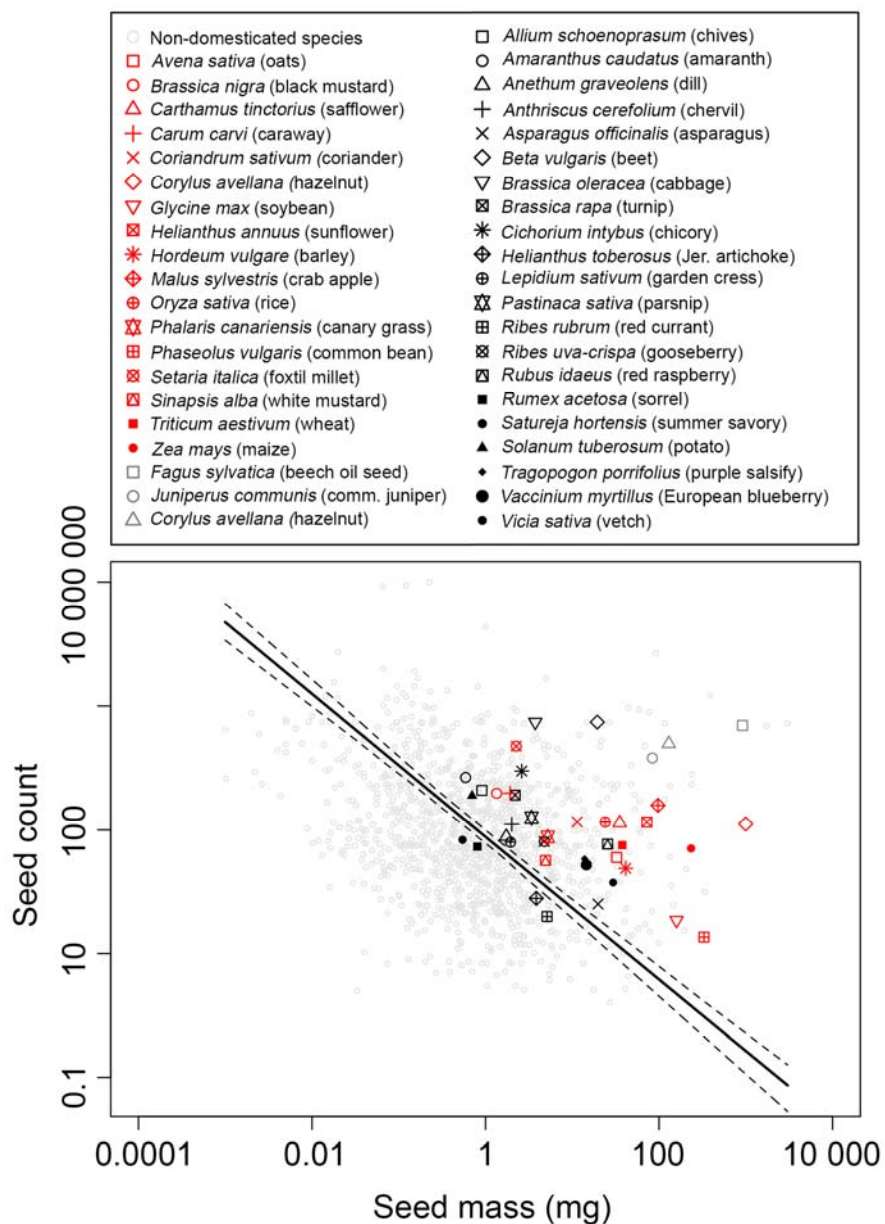

489

490

491 **Fig. 1.** Relationship between seed mass and seed output across  $n=1190$  non-domesticated  
 492 species and  $n=41$  of the world's most widespread crops. Solid black trend line represents  
 493 a standardized major axis regression fit across the entire dataset ( $n=1231$ ) and dashed  
 494 lines represent 95% confidence limits.



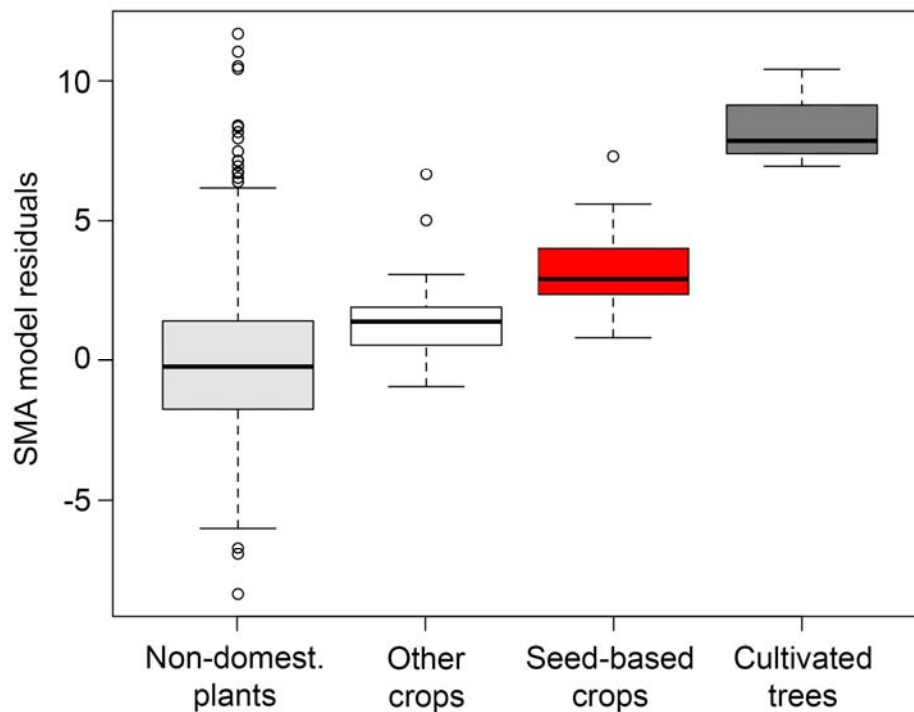

495

496

497 **Fig. 2.** Deviations from a global seed mass-seed output trade-off in three types of crops  
498 and non-domesticated plants. Deviations from a global SM-SO relationship are calculated  
499 as residuals from a standardized major axis regression fit to  $n=1231$  plant species (see  
500 Fig. 1). “Other crops” ( $n=21$ ) correspond to plant species cultivated for vegetative- or  
501 belowground structures. Sample sizes for seed-based crops, cultivated trees, and non-  
502 domesticated plants are  $n=17$ ,  $n=3$ , and  $n=1190$ , respectively.

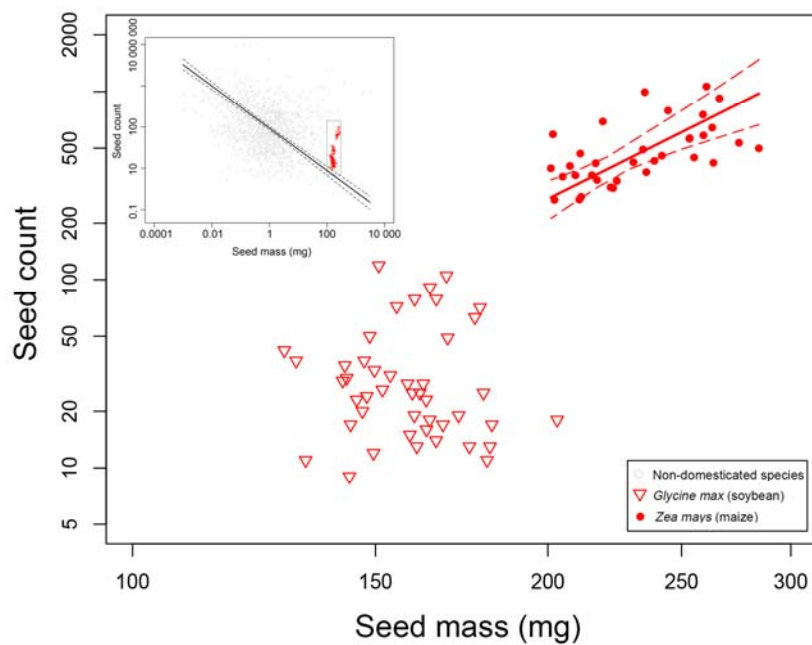

503

504

505 **Fig. 3.** Seed mass and seed output in soybean (*Glycine max*,  $n=45$ ) and maize (*Zea maize*,  
506  $n=37$ ). Data are presented in relation to a SM-SO trade-off observed across 1231 plant  
507 species (gray rectangle, inset graph). Solid red trend line represents a standardized major  
508 axis (SMA) regression fit to the maize data with red dashed lines representing 95%  
509 confidence limits. The SMA model fit to soy data was not significant, so is not presented  
510 here.

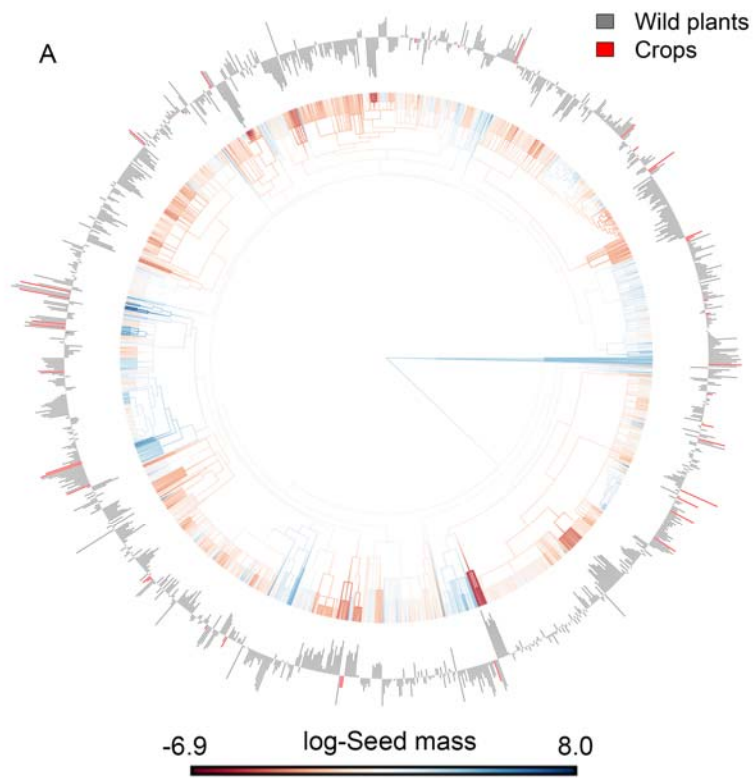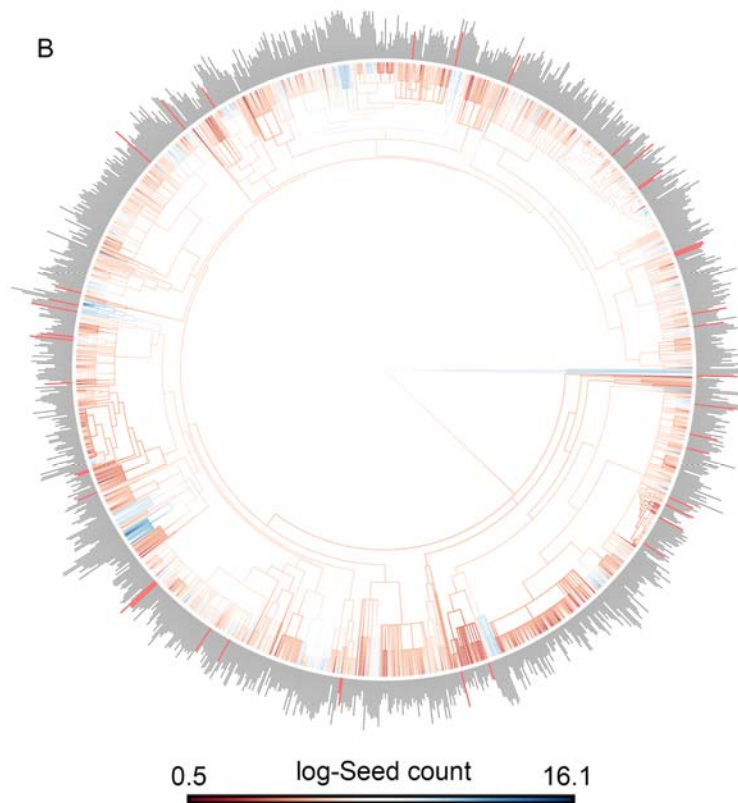

512 **Fig. 4.** Variation in seed mass (A) and seed output (B) across a phylogeny of 1,231 crop-  
513 and wild plant species. Bars across the tips of the phylogeny represent mean seed mass  
514 and seed count (plant<sup>-1</sup>) values, with crop species highlighted in red and wild plants in  
515 gray.
